# Supplementary material
Source: ML conference proceedings conference paper supplement (https://openaccess.thecvf.com/content/CVPR2024/html/Zhao_Stable_Neighbor_Denoising_CVPR_2024_paper.html)
Supplement: Supplementary file 1 [file Zhao_Stable_Neighbor_Denoising_CVPR_2024_supplemental.pdf]

# Stable Neighbor Denoising for Source-free Domain Adaptive Segmentation (Supplementary Material)

Dong Zhao<sup>1</sup>, Shuang Wang<sup>1</sup> ✉, Qi Zang<sup>1</sup>, Licheng Jiao<sup>1</sup>, Nicu Sebe<sup>2</sup>, Zhun Zhong<sup>3,4</sup> ✉

<sup>1</sup> School of Artificial Intelligence, Xidian University, Shaanxi, China

<sup>2</sup> Department of Information Engineering and Computer Science, University of Trento, Italy

<sup>3</sup> School of Computer Science and Information Engineering, Hefei University of Technology, China

<sup>4</sup> School of Computer Science, University of Nottingham, NG8 1BB Nottingham, UK

## 1. Why using the inner optimization for the teacher model.

Applying Bi-Level optimization to the same model (BL on same) also works well, as shown in the table below. We employ it in the student-teacher framework (S-T) for two reasons. First, teachers obtained by Exponential Moving Average (EMA) often outperform student models [1, 3], providing more accurate pseudo-labels for students and promoting the stability of self-training. Second, most existing SFDA works are employed based on it, we keep this design for a fair comparison.

|                       | BL on same | BL on S-T | BL on same + DTST | BL on S-T + DTST |
|-----------------------|------------|-----------|-------------------|------------------|
| GTA → Cityscapes (CS) | 55.1       | 55.6      | 57.5              | 58.1             |
| Synthia → CS          | 53.4       | 54.1      | 54.7              | 55.4             |
| CS → ACDC             | 47.7       | 48.1      | 48.9              | 49.6             |
| GTA → BDD100k         | 47.1       | 47.8      | 48.7              | 49.5             |

## 2. Does S-T cause bias in bi-level optimization?

We supplement the ablations of querying strategies (Table 5) on both implements in the below TABLE. It shows that retrieving nearest neighbors ( $Q_{layout} + Q_{style}$ ) brings significant improvements on both ‘S-T model’ and ‘same model’ implementations. This verifies that *domain factors are the main factors causing bias in Bi-level optimization instead of using S-T model.*

| Query method             | BL on same model |           | BL on S-T |           |
|--------------------------|------------------|-----------|-----------|-----------|
|                          | GTA → CS         | CS → ACDC | GTA → CS  | CS → ACDC |
| Random                   | 53.5             | 43.4      | 54.8      | 44.7      |
| $Q_{layout}$             | 54.9             | 44.2      | 55.3      | 44.9      |
| $Q_{style}$              | 54.4             | 47.1      | 55.6      | 47.5      |
| $Q_{layout} + Q_{style}$ | 55.1             | 47.7      | 55.6      | 48.1      |

## 3. Whether using multiple inner loops with multiple neighbors are useful?

In principle, using multi-step inner loops with multiple neighbors will indeed lead to more stable gradient opti-

mization. However, the computational overhead of multi-step optimization is too high and difficult to accept in actual training. We show (Table 1) that using “multi-step inner loops” obtains very similar results as “one-step one”, but significantly increases the training time. In addition, we show that replacing our “retrieving nearest neighbors” by “random neighbors” clearly reduces the performance for “multi-step inner loops”. These results indicate that 1) one-step inner loop is sufficient for our method and that 2) our “retrieving nearest neighbors” is important and saves a lot of training time compared to the “random one”. Therefore, retrieving nearest neighbors is an effective way to eliminate bi-level optimization bias under limited iterations and acceptable cost.

|                       | 0-step | 1-step | 2-step | 3-step | random 3-step |
|-----------------------|--------|--------|--------|--------|---------------|
| Ours (mIoU %)         | 50.5   | 55.6   | 56.1   | 56.4   | 53.5          |
| Training Time (hours) | 12.5   | 18.4   | 36.7   | 70.5   | 70.1          |
| Ours + DTST (mIoU %)  | 54.4   | 58.1   | 58.3   | 58.6   | 56.5          |
| Training Time (hours) | 13.1   | 20.5   | 40.9   | 80.5   | 79.9          |

Table 1. The impact of the number of inner loops on performance and time-consuming in GTA → Cityscapes task.

## 4. Whether the estimated $\omega^*$ in the current iteration can be used as initialization for the next optimization? And is there any other manner?

We further implement the predicted probabilities as initial values for  $\omega$ . The Table below shows that using the last  $\omega^*$  achieves largely lower results than ours and the probability-based variant. The main reason is:  $\omega$  measures the status of the current pseudo-labels. When the model optimizes that sample again, it has been updated multiple times, so its pseudo-labels undergo significant changes. It results in the last  $\omega^*$  not matching with the current pseudo-labels at all.

|                               | Last $\omega$ | All Ones (Ours) | Probability |
|-------------------------------|---------------|-----------------|-------------|
| GTA $\rightarrow$ Cityscapes  | 52.1          | 55.6            | 55.2        |
| Cityscapes $\rightarrow$ ACDC | 45.1          | 48.1            | 47.7        |

## 5. Work on both CNN and Transformer.

In the table below, we add the results of using the Segformer [2], indicating that our method consistently improves the performance on both CNN and Transformer.

|                               | Segformer |      |      |
|-------------------------------|-----------|------|------|
|                               | Source    | DTST | Ours |
| GTA $\rightarrow$ Cityscapes  | 52.6      | 60.7 | 62.9 |
| Cityscapes $\rightarrow$ ACDC | 47.7      | 50.2 | 51.6 |
| GTA $\rightarrow$ BDD100k     | 47.1      | 51.6 | 53.7 |

## 6. Detailed weather results on Cityscapes $\rightarrow$ ACDC.

|          | Fog  | Night | Rain | Snow | mIoU |
|----------|------|-------|------|------|------|
| DTST [3] | 56.1 | 32.1  | 46.7 | 46.9 | 45.4 |
| SND      | 57.2 | 34.1  | 51.3 | 49.8 | 48.1 |
| DTST+SND | 60.1 | 34.5  | 53.6 | 51.6 | 49.6 |

## References

- [1] Lukas Hoyer, Dengxin Dai, and Luc Van Gool. Daformer: Improving network architectures and training strategies for domain-adaptive semantic segmentation. In *Proceedings of the IEEE/CVF Conference on Computer Vision and Pattern Recognition*, pages 9924–9935, 2022. [1](#)
- [2] Enze Xie, Wenhai Wang, Zhiding Yu, Anima Anandkumar, Jose M Alvarez, and Ping Luo. Segformer: Simple and efficient design for semantic segmentation with transformers. *Advances in Neural Information Processing Systems*, 34:12077–12090, 2021. [2](#)
- [3] Dong Zhao, Shuang Wang, Qi Zang, Dou Quan, Xiutiao Ye, and Licheng Jiao. Towards better stability and adaptability: Improve online self-training for model adaptation in semantic segmentation. In *Proceedings of the IEEE/CVF Conference on Computer Vision and Pattern Recognition*, pages 11733–11743, 2023. [1](#), [2](#)
